# Supplementary material for: A dual-function [Ru(bpy)3]2+ encapsulated metal organic framework for ratiometric Al3+ detection and anticounterfeiting application
Source: Royal Society of Chemistry journal article supplement (doi:10.1039/d2dt03388g), 2023-01-01
Supplement: d2dt03388g1.pdf [file d2dt03388g1.pdf]

**A Dual-function [Ru(bpy)<sub>3</sub>]<sup>2+</sup> Encapsulated Metal–Organic Framework for Ratiometric Al<sup>3+</sup> detection and anticounterfeiting application**

Huijun Li\*, Yanan Wang, Fengjiao Jiang, Manman Li, Zhouqing Xu\*

Department of Chemistry and Chemical Engineering, Henan Polytechnic University, Jiaozuo, Henan 454000, China, [lihuijunxgy@hpu.edu.cn](mailto:lihuijunxgy@hpu.edu.cn); [zhqxu@hpu.edu.cn](mailto:zhqxu@hpu.edu.cn).

## Materials Characterization Section

**Table S1.** Crystal data for **HPU-24**.

| <b>Complex</b>                                  | <b>HPU-24</b>                                                    |
|-------------------------------------------------|------------------------------------------------------------------|
| Formula                                         | C <sub>33</sub> H <sub>29</sub> Cd <sub>2</sub> NO <sub>12</sub> |
| formula weight, fw                              | 856.37                                                           |
| Temperature, <i>T</i> [K]                       | 193.00                                                           |
| crystal system                                  | <i>monoclinic</i>                                                |
| space group                                     | <i>P 2<sub>1</sub>/c</i>                                         |
| a [Å]                                           | 14.0828(16)                                                      |
| b [Å]                                           | 10.9927(12)                                                      |
| c [Å]                                           | 23.566(3)                                                        |
| α [°]                                           | 90                                                               |
| β [°]                                           | 98.544(5)                                                        |
| γ [°]                                           | 90                                                               |
| V [Å <sup>3</sup> ]                             | 3607.7(7)                                                        |
| Z                                               | 4                                                                |
| ρ [g cm <sup>-3</sup> ]                         | 1.577                                                            |
| μ [mm <sup>-1</sup> ]                           | 6.769                                                            |
| θ range                                         | 3.300- 61.010                                                    |
| F(000)                                          | 1704                                                             |
| goodness-of-fit, GOF                            | 1.067                                                            |
| <i>R</i> <sub>1</sub> <sup>a</sup> [I > 2σ (I)] | 0.0708                                                           |
| w <i>R</i> <sub>2</sub> <sup>b</sup> (all data) | 0.1762                                                           |

$${}^aR_1 = \frac{\sum ||F_o| - |F_c||}{\sum |F_o|} \cdot {}^b wR_2 = [\sum (|F_o|^2 - |F_c|^2)^2 / \sum |F_o|^2]^{1/2}.$$

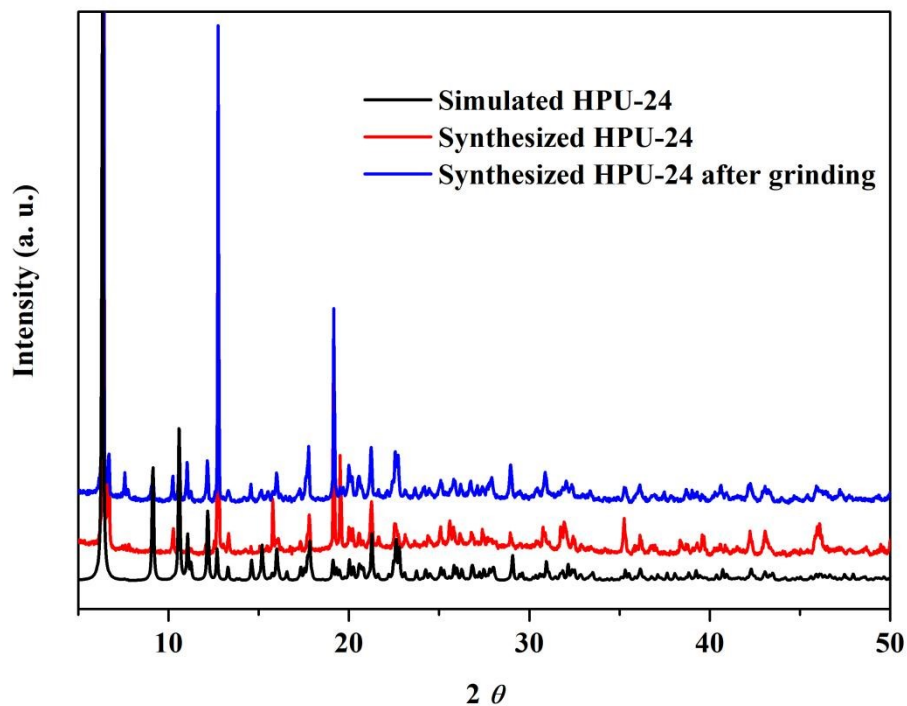

**Figure S1** PXRD patterns of simulated **HPU-24**, synthesized **HPU-24** and synthesized **HPU-24** after grinding.

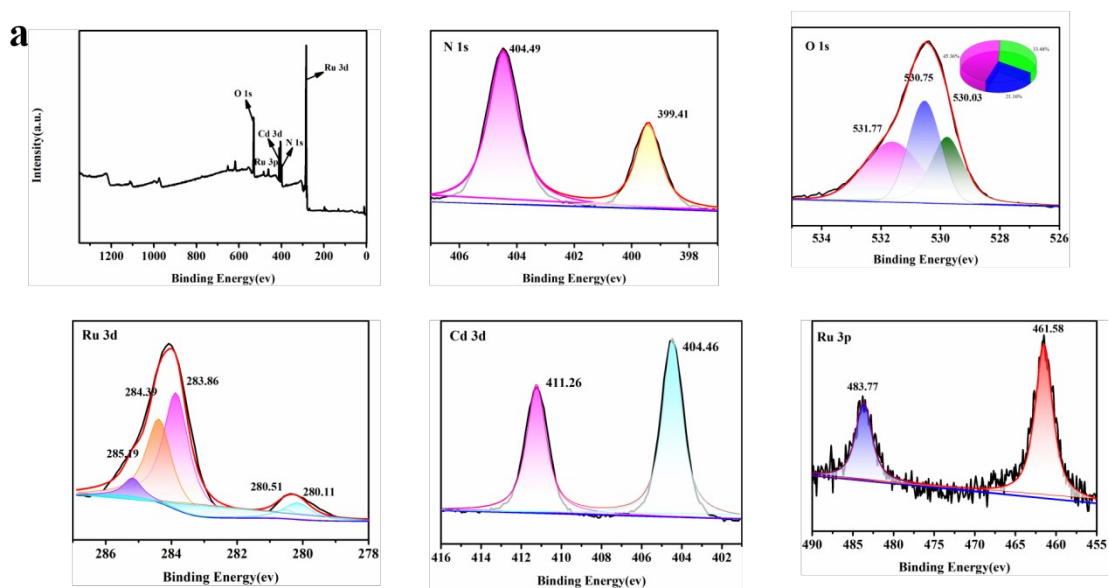

**Figure S2** XPS results of **HPU-24@Ru**.

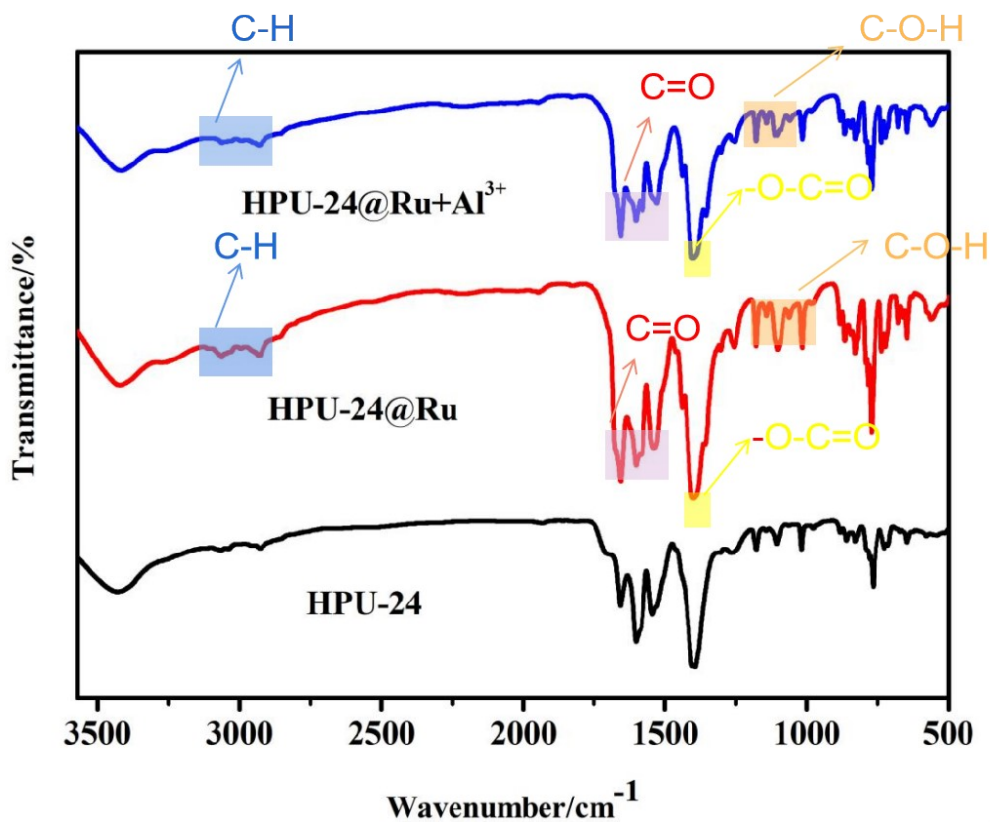

Figure S3 The IR spectra of different products.

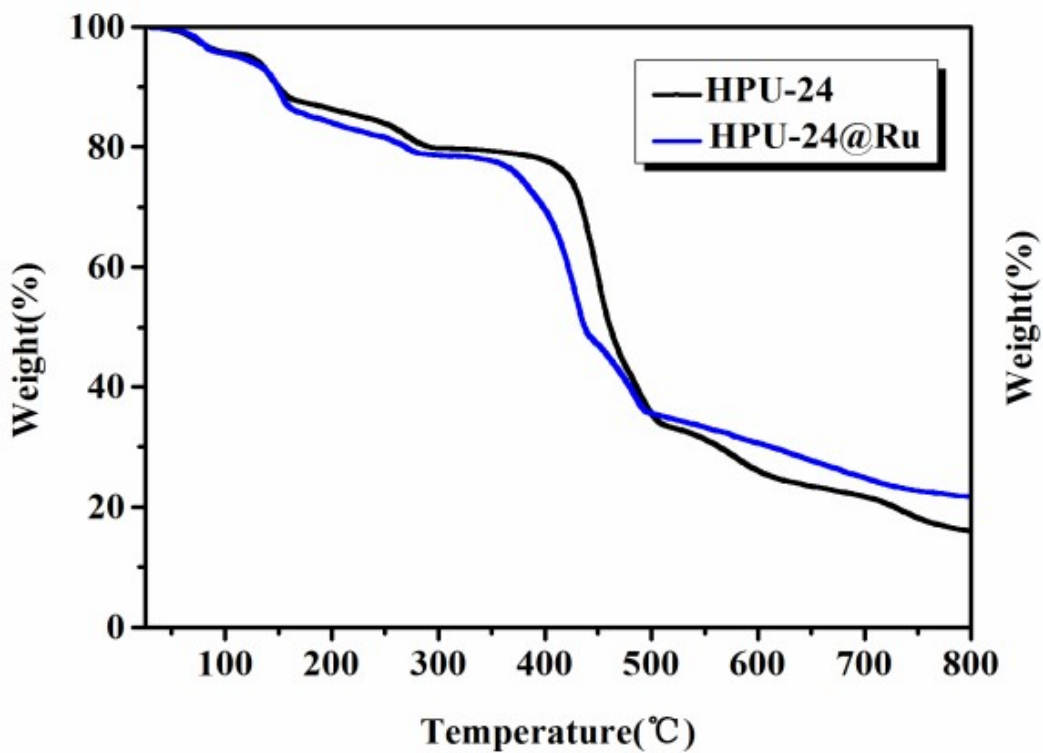

Figure S4 TGA analysis of HPU-24 and HPU-24@Ru.

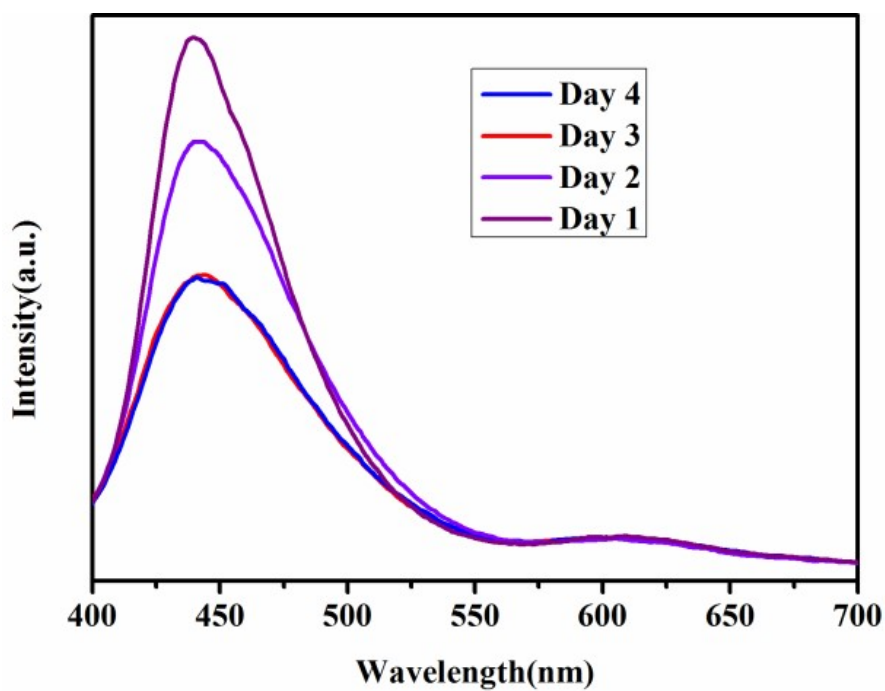

**Figure S5** Fluorescence spectra of **HPU-24@Ru** in the water over four days under the excitation of 365 nm.

**Table S2.** Loading capacity of  $\text{Ru}(\text{bpy})_3^{2+}$  in **HPU-24@Ru** .

| Inductively Coupled Plasma-Atomic Emission Spectrometry | Ru weight amount measure by ICP-AES (mg) | $[\text{Ru}(\text{bpy})_3]^{2+}$ weight amount (mg) | Loading capacity (wt%) |
|---------------------------------------------------------|------------------------------------------|-----------------------------------------------------|------------------------|
| Ru                                                      | 0.011                                    | 0.0697                                              | 6.51                   |

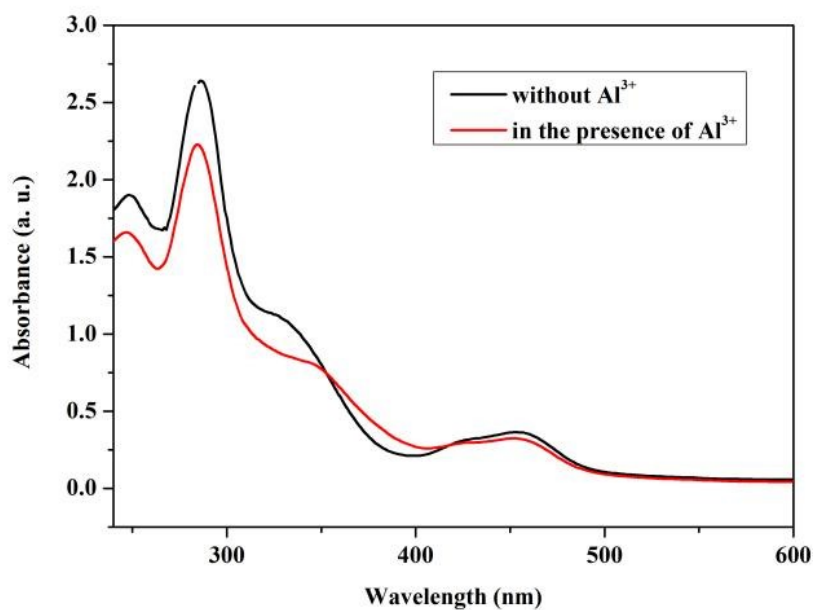

**Figure S6** UV-vis spectra of **HPU-24@Ru** in the absence or presence of  $\text{Al}^{3+}$  ions.

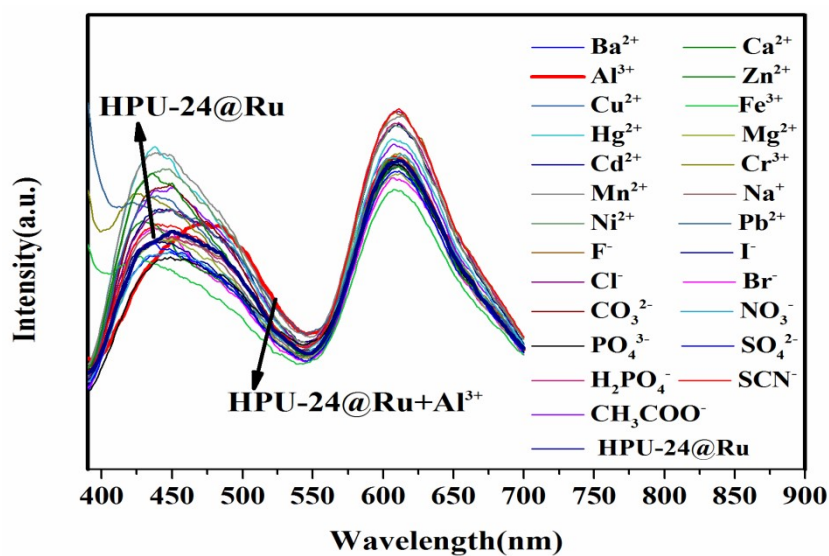

**Figure S7** Changes of luminescence intensity at 480 and 610 nm with respect of emission of **HPU-24@Ru** ( $10 \mu\text{mol}\cdot\text{L}^{-1}$ ) with  $\text{Al}^{3+}$  in aqueous solution with  $50 \mu\text{L}$  of coexistent metal cations ( $\text{Na}^+$ ,  $\text{K}^+$ ,  $\text{Mg}^{2+}$ ,  $\text{Ca}^{2+}$ ,  $\text{Ba}^{2+}$ ,  $\text{Sr}^{2+}$ ,  $\text{Zn}^{2+}$ ,  $\text{Co}^{2+}$ ,  $\text{Cu}^{2+}$ ,  $\text{Ni}^{2+}$ ,  $\text{Cd}^{2+}$ ,  $\text{Mn}^{2+}$ ,  $\text{Fe}^{3+}$ ,  $\text{Pb}^{2+}$ ,  $\text{Ag}^+$ ,  $\text{Al}^{3+}$ ,  $\text{Cr}^{3+}$  and  $\text{Fe}^{2+}$ ) ( $\text{Ex} = 365 \text{ nm}$ ).

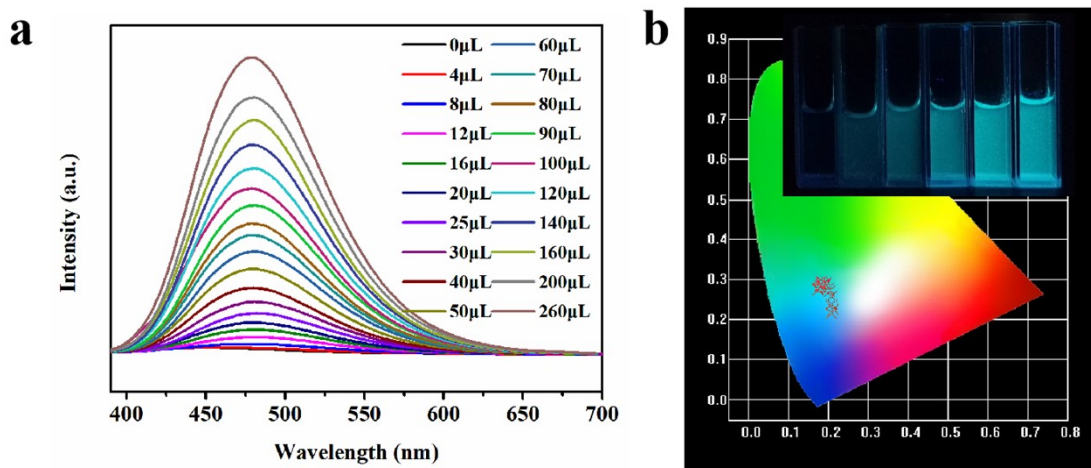

**Figure S8** (a) Fluorescence sensing performance of **HPU-24** towards  $\text{Al}^{3+}$  ions; (b) the CIE chromaticity diagram of **HPU-24** with 0-260  $\mu\text{L}$   $\text{Al}^{3+}$  ions under an excitation of 365 nm (inset: the photos showing the corresponding fluorescence color changes triggered by  $\text{Al}^{3+}$  ions).

**Table S3** The performance of different  $\text{Al}^{3+}$  sensors.

| Fluorescent probes                                                                       | Detection limit         | Ref |
|------------------------------------------------------------------------------------------|-------------------------|-----|
| AX-AuNPs                                                                                 | 20 $\mu\text{M}$        | 52  |
| $\text{Eu}(\text{OAc})_3 \cdot 4\text{H}_2\text{O}$                                      | $10^{-4}$ M             | 8   |
| $[\text{Eu}_2(\text{ppda})_2(\text{npdc})(\text{H}_2\text{O})] \cdot \text{H}_2\text{O}$ | $1.09 \times 10^{-4}$ M | 53  |
